# Supplementary material for: Multiple In Vivo Biological Processes Are Mediated by Functionally Redundant Activities of Drosophila mir-279 and mir-996
Source: PubMed Central journal article supplement (PMC4456407; doi:10.1371/journal.pgen.1005245), 2015-06-04
Supplement: pgen.1005245.s001.pdf [file pgen.1005245.s001.pdf]

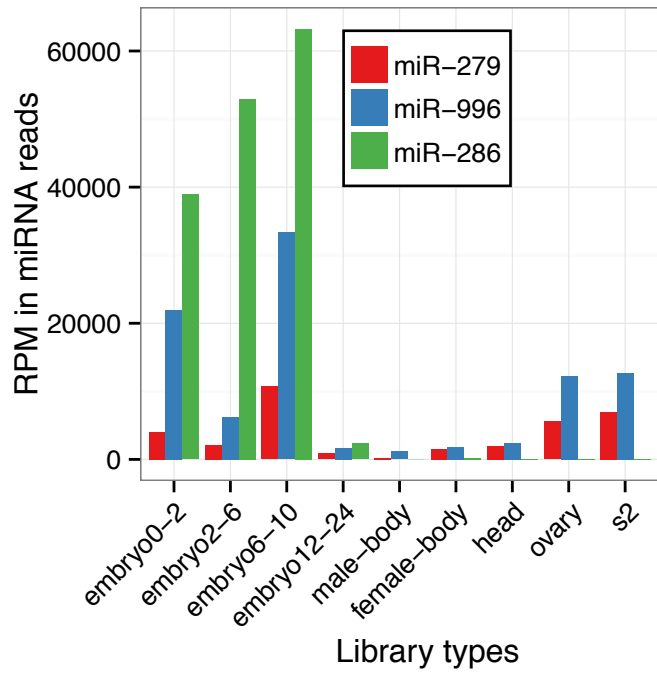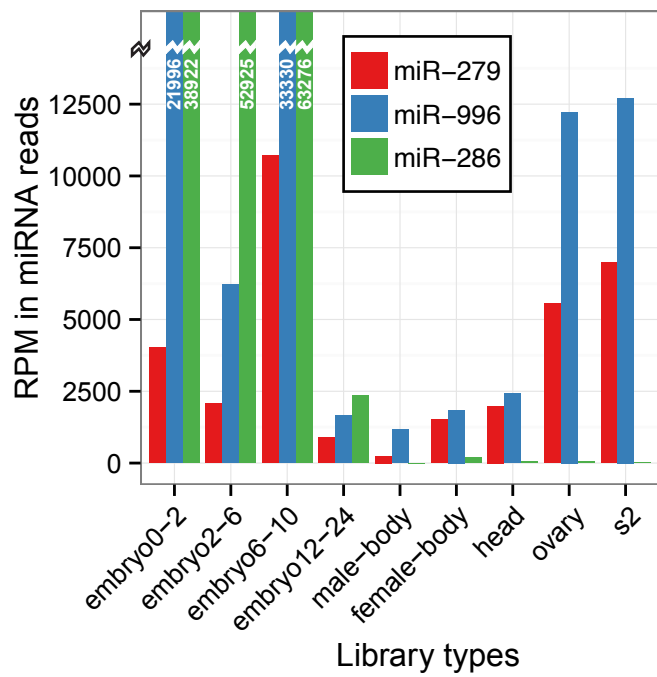

Sun et al  
Supplementary Figure 1
