# Supplementary material for: Multiple In Vivo Biological Processes Are Mediated by Functionally Redundant Activities of Drosophila mir-279 and mir-996
Source: PubMed Central journal article supplement (PMC4456407; doi:10.1371/journal.pgen.1005245), 2015-06-04
Supplement: pgen.1005245.s004.pdf [file pgen.1005245.s004.pdf]

| Supplementary Table 1. Primers for mir-279/996 rescue constructs and sensor constructs                                                                                                                                                                                                                        |                                                              |                                                        |
|---------------------------------------------------------------------------------------------------------------------------------------------------------------------------------------------------------------------------------------------------------------------------------------------------------------|--------------------------------------------------------------|--------------------------------------------------------|
| generation of 3.4kb rescue construct                                                                                                                                                                                                                                                                          |                                                              | NOTE                                                   |
| NotI-mir279-3.4k-Fwd                                                                                                                                                                                                                                                                                          | ATAAGAATGCGGCCGCTGAAAATACGCGTATGGAATGCC                      |                                                        |
| BglII-mir279-3.4k-Rev                                                                                                                                                                                                                                                                                         | GAAGATCTCAGAATCGGAATCGGAATCAG                                |                                                        |
| generation of 16.6kb wild type construct                                                                                                                                                                                                                                                                      |                                                              |                                                        |
| Asc-16.6kb-5'LA-Fwd                                                                                                                                                                                                                                                                                           | TTGGCGCGCCGCCATTTTCGGTCGGATTACG                              |                                                        |
| BamH-16.6kb-5'LA-Rev                                                                                                                                                                                                                                                                                          | AGCAGCGAACTATGTTAAGATGGAAGGGATCCCATCCTGCCTTCTCTGTAGTTCAG     | ~600bp left arm                                        |
| BamH-16.6kb-3'RA-Fwd                                                                                                                                                                                                                                                                                          | CTGGAACACAGAGAAGGCAGGATGGGATCCCTCCATCTTAACATAGTTCGCTGCT      |                                                        |
| Not-16.6kb-3'RA-Rev                                                                                                                                                                                                                                                                                           | ATAGTTTAGCGGCCGCGAAAATCCTCACTGCCCTGTG                        | ~600bp right arm                                       |
| generation of mir-279-1x and mir-996-1x constructs                                                                                                                                                                                                                                                            |                                                              |                                                        |
| Bbv-mir279-LA-rpsLneo-Fwd                                                                                                                                                                                                                                                                                     | GAATTGGGACTGGAGCTGGAATTCCTCAGCGCCCTGGTGATGATGGCGGGATCG       |                                                        |
| mir279-LA-Fwd2                                                                                                                                                                                                                                                                                                | AATGGAGAACGCAAAAATCCCATTTATAATGGAATTGGGACTGGAGCTGGAATT       | ~50bp left arm for mir-279                             |
| Bbv-mir279-LA-rpsLneo-Rev                                                                                                                                                                                                                                                                                     | GTCAAGAAAACACGTCGCTTGTGATGTTGCTGAGGTCAGAAGAAGCTCGTCAAGAAGGCG |                                                        |
| mir279-RA-Rev2                                                                                                                                                                                                                                                                                                | CTTTTCGAATGAAGTACACGCGAAGTTTGTCAAGAAAACACGTCGTTGATGATT       | ~50bp right arm for mir-279                            |
| Bbv-mir996-LA-rpsLneo-Fwd                                                                                                                                                                                                                                                                                     | GGATGTGGGGGAAAGGATGCTCTTTCCTCAGCGCCCTGGTGATGATGGCGGGATCG     |                                                        |
| mir996-LA-Fwd2                                                                                                                                                                                                                                                                                                | CATCCGGGCGAGAAGGAGCCCAATAGTGGGGATGTGGGGAAGGATGCTCTTT         | ~50bp left arm for mir-996                             |
| Bbv-mir996-RA-rpsLneo-Rev                                                                                                                                                                                                                                                                                     | AAAAGCTCCGCTCTCTCGTTGTGGCTCAGAGTCAGAAGAAGCTCGTCAAGAAGGCG     |                                                        |
| mir996-RA-Rev2                                                                                                                                                                                                                                                                                                | AAAACGACTCCCTCCGATCCCGCGAGATGAAAAGCTCCGCTCTCTCGTTGTG         | ~50bp right arm for mir-996                            |
| generation of mir-279-2x construct                                                                                                                                                                                                                                                                            |                                                              |                                                        |
| Asc-13.5kb-5'LA-Fwd                                                                                                                                                                                                                                                                                           | TTGGCGCGCCGCCATTTTCGGTCGGATTACG                              |                                                        |
| BamH-13.5kb-5'LA-Rev                                                                                                                                                                                                                                                                                          | GGGCACAAAACAGAGAGCAGAGGGATCCCATCCTGCCTTCTCTGTAGTTCAG         | ~600bp left arm for mir-996 13.5kb upstream fragment   |
| BamH-13.5kb-3'RA-Fwd                                                                                                                                                                                                                                                                                          | CTGGAACACAGAGAAGGCAGGATGGGATCCCTCCTGCTCTGTTTTGTGCC           |                                                        |
| Not-13.5kb-3'RA-Rev                                                                                                                                                                                                                                                                                           | ATAGTTTAGCGCGCGCAAGAGCATCCTTCCACATCC                         | ~600bp right arm for mir-996 13.5kb upstream fragment  |
| Asc-3.0kb-5'LA-Fwd                                                                                                                                                                                                                                                                                            | TTGGCGCGCCACAACGAGAGCGGAGCTTTTC                              |                                                        |
| BamH-3.0kb-5'LA-Rev                                                                                                                                                                                                                                                                                           | AGCAGCGAACTATGTTAAGATGGAAGGGATCCACAACGACAACAACCCCTCGC        | ~600bp left arm for mir-996 3.0kb downstream fragment  |
| BamH-3.0kb-3'RA-Fwd                                                                                                                                                                                                                                                                                           | GCGAGGGTTGTTGTTGTCGTTGTGGATCCCTTCCATCTTAACATAGTTCGCTGCT      |                                                        |
| Not-3.0kb-3'RA-Rev                                                                                                                                                                                                                                                                                            | ATAGTTTAGCGCGCGCGAAAATCCTCACTGCCCTGTG                        | ~600bp right arm for mir-996 3.0kb downstream fragment |
| Asc-Not-mir279-Fwd                                                                                                                                                                                                                                                                                            | TTGGCGCGCTAGCGGCCGCGAATTCATACTACTGTTTTAGTGGGTG               |                                                        |
| Asc-mir279-Rev                                                                                                                                                                                                                                                                                                | TTGGCGCGCCGAACTACCGTTTATAGAGTGGATCT                          | cloning of mir-279 hairpin                             |
| generation of mir-996-2x construct                                                                                                                                                                                                                                                                            |                                                              |                                                        |
| Asc-11.8kb-5'LA-Fwd                                                                                                                                                                                                                                                                                           | TTGGCGCGCCGCCATTTTCGGTCGGATTACG                              |                                                        |
| BamH-11.8kb-5'LA-Rev                                                                                                                                                                                                                                                                                          | GCCCTCTGTTGTTGTGTTCTTCTTCCGGATCCCATCCTGCCTTCTCTGTAGTTCAG     | ~600bp left arm for mir-279 11.8kb upstream fragment   |
| BamH-11.8kb-3'RA-Fwd                                                                                                                                                                                                                                                                                          | CTGGAACACAGAGAAGGCAGGATGGGATCCGAAGAAGACAACAACAAGAGGGC        |                                                        |
| Not-11.8kb-3'RA-Rev                                                                                                                                                                                                                                                                                           | ATAGTTTAGCGCGCCCAATCCAGCTCCAGTCCCAATTC                       | ~600bp right arm for mir-279 11.8kb upstream fragment  |
| Asc-4.7kb-5'LA-Fwd                                                                                                                                                                                                                                                                                            | TTGGCGCGCGTTCAATCATCAAGCACGTTTTC                             |                                                        |
| BamH-4.7kb-5'LA-Rev                                                                                                                                                                                                                                                                                           | AGCAGCGAACTATGTTAAGATGGAAGGGATCCGGAACAAAAGGGACTGACTCAG       | ~600bp left arm for mir-279 4.7kb downstream fragment  |
| BamH-4.7kb-3'RA-Fwd                                                                                                                                                                                                                                                                                           | CTGAGTCAGTCCCTTTTGTTCGGGATCCCTTCCATCTTAACATAGTTCGCTGCT       |                                                        |
| Not-4.7kb-3'RA-Rev                                                                                                                                                                                                                                                                                            | ATAGTTTAGCGCGCGGAAAATCCTCACTGCCCTGTG                         | ~600bp right arm for mir-279 4.7kb downstream fragment |
| Asc-Not-mir996-Fwd                                                                                                                                                                                                                                                                                            | TTGGCGCGCTAGCGGCCGCTCTGACTCTATTTTGTGCGCGAACAT                |                                                        |
| Asc-mir996-Rev                                                                                                                                                                                                                                                                                                | TTGGCGCGCCTGACCAACTTAATAGACGAGCATGA                          | cloning of mir-996 hairpin                             |
| NOTE:<br>Primers "Asc-16.6kb-5'LA-Fwd", "Asc-13.5kb-5'LA-Fwd" and "Asc-11.8kb-5'LA-Fwd" are the same.<br>Primers "Not-16.6kb-3'RA-Rev", "Not-3.0kb-3'RA-Rev" and "Not-4.7kb-3'RA-Rev" are the same.<br>Therefore, all large rescue transgene have roughly the same size of 16.6kb and the same 5' and 3'ends. |                                                              |                                                        |
| Primers for luciferase sensor constructs                                                                                                                                                                                                                                                                      |                                                              |                                                        |
| Xho-boss-Psi-Fwd                                                                                                                                                                                                                                                                                              | CCGCTCGAGATCCACAACGTCCTCCACT                                 |                                                        |
| Not-boss-siR1                                                                                                                                                                                                                                                                                                 | ATAGTTTAGCGGCCGCTCTTGGTTCGTCAGTGATT                          |                                                        |
| Xho-esg-Psi-Fwd                                                                                                                                                                                                                                                                                               | CCGCTCGAGGAACTCAACTACGCCGGCTAT                               |                                                        |
| Not-esg-siR1                                                                                                                                                                                                                                                                                                  | ATAGTTTAGCGGCCGCGTATTTCTTCTTCTTCGCTTGATG                     |                                                        |
| Xho-gcm-Psi-Fwd                                                                                                                                                                                                                                                                                               | CCGCTCGAGGCTAGGGGATCGGGATAAGAT                               |                                                        |
| Not-gcm-siR1                                                                                                                                                                                                                                                                                                  | ATAGTTTAGCGGCCGCGTACTCACAAATGCCATAGTTCGG                     |                                                        |
| Xho-nerfin-Psi-Fwd                                                                                                                                                                                                                                                                                            | CCGCTCGAGCATGGCCCACTGAAATCGAG                                |                                                        |
| Not-nerfin-siR1                                                                                                                                                                                                                                                                                               | ATAGTTTAGCGGCCGCGAGTTTTCGCTTTTATTCAAGAGCTT                   |                                                        |
| Xho-neur-Psi-Fwd                                                                                                                                                                                                                                                                                              | CCGCTCGAGCTACACCACGTAGAAAGGTC                                |                                                        |
| Not-neur-siR1                                                                                                                                                                                                                                                                                                 | ATAGTTTAGCGGCCGCTCCGCTTTGCTTGTCTTCA                          |                                                        |
| Xho-rho-Psi-Fwd                                                                                                                                                                                                                                                                                               | CCGCTCGAGGAGATCGAGAGACAGAGAT                                 |                                                        |
| Not-rho-siR1                                                                                                                                                                                                                                                                                                  | ATAGTTTAGCGGCCGCGTGAGGGGATTACGATGCTC                         |                                                        |
| Xho-ru-Psi-Fwd                                                                                                                                                                                                                                                                                                | CCGCTCGAGGCAGCATCTGATGAATGACC                                |                                                        |
| Not-ru-siR1                                                                                                                                                                                                                                                                                                   | ATAGTTTAGCGGCCGCTAAGCCTAAGTAGGCAACTC                         |                                                        |
| Xho-STAT-Psi-Fwd                                                                                                                                                                                                                                                                                              | CCGCTCGAGGTGAAACGCCAAAACACAAGAAC                             |                                                        |
| Not-STAT-siR1                                                                                                                                                                                                                                                                                                 | ATAGTTTAGCGGCCGCGGGGTGTACTTAAGTCTTATAAAATTC                  |                                                        |
| Xho-upd-Psi-Fwd                                                                                                                                                                                                                                                                                               | CCGCTCGAGCGTGAATAGCATACACAACATCC                             |                                                        |
| Not-upd-siR1                                                                                                                                                                                                                                                                                                  | ATAGTTTAGCGGCCGCGTTCGCTTTATCCGCTGCTG                         |                                                        |
| Primers for qPCR assays                                                                                                                                                                                                                                                                                       |                                                              |                                                        |
| Nerfin1 fw                                                                                                                                                                                                                                                                                                    | AAGCGTAAATGAGCCGGGA                                          |                                                        |
| Nerfin1 rev                                                                                                                                                                                                                                                                                                   | CATCGAACTTCAGCTTGCGG                                         |                                                        |
| Escargot fw                                                                                                                                                                                                                                                                                                   | ATCACCATGCGCTATCTCG                                          |                                                        |
| Escargot rev                                                                                                                                                                                                                                                                                                  | CGGCTGGTCTTGTCTCTCT                                          |                                                        |
| Rpl32 fw                                                                                                                                                                                                                                                                                                      | CCGCTTCAAGGGACAGTATC                                         |                                                        |
| Rpl32 rev                                                                                                                                                                                                                                                                                                     | ACGTTGTGCCACGAGAACTT                                         |                                                        |
